# Supplementary material for: Microstructural, rheological, and antibacterial properties of cross-linked chitosan emulgels
Source: Royal Society of Chemistry journal article supplement (doi:10.1039/c5ra19757k), 2015-01-01
Supplement: c5ra19757k1.pdf [file c5ra19757k1.pdf]

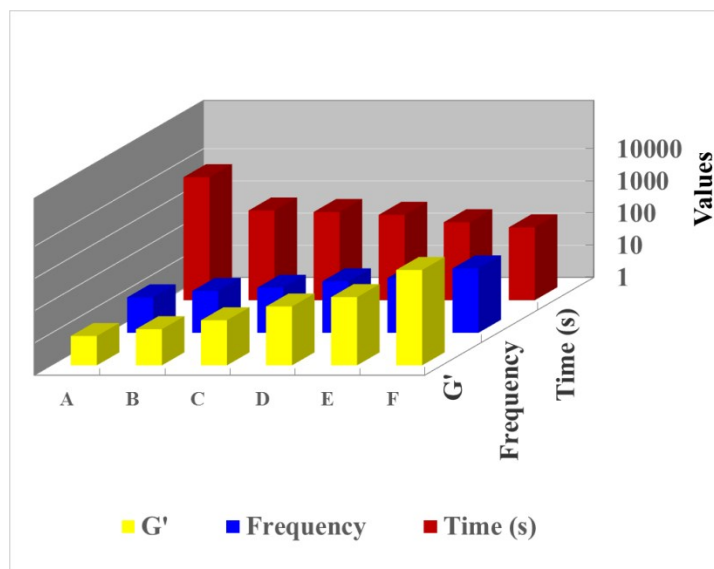

**Fig. 1S.** Plots of time when  $G'= 1$  Pa and  $G'/\text{frequency}$  when  $G'= G''$  after the gelation point. Chitosan concentration in all the emulgels was 0.5 wt% and CA nanoemulsion contents varied: (A) 0.5%; (B) 1%; (C) 2%; (D) 3%; (E) 4%; (F) 5%
